# Supplementary material for: Sex influences DNA methylation and gene expression in human skeletal muscle myoblasts and myotubes
Source: PubMed Central journal article supplement (PMC6332625; doi:10.1186/s13287-018-1118-4), 2019-01-15

### Myoblasts

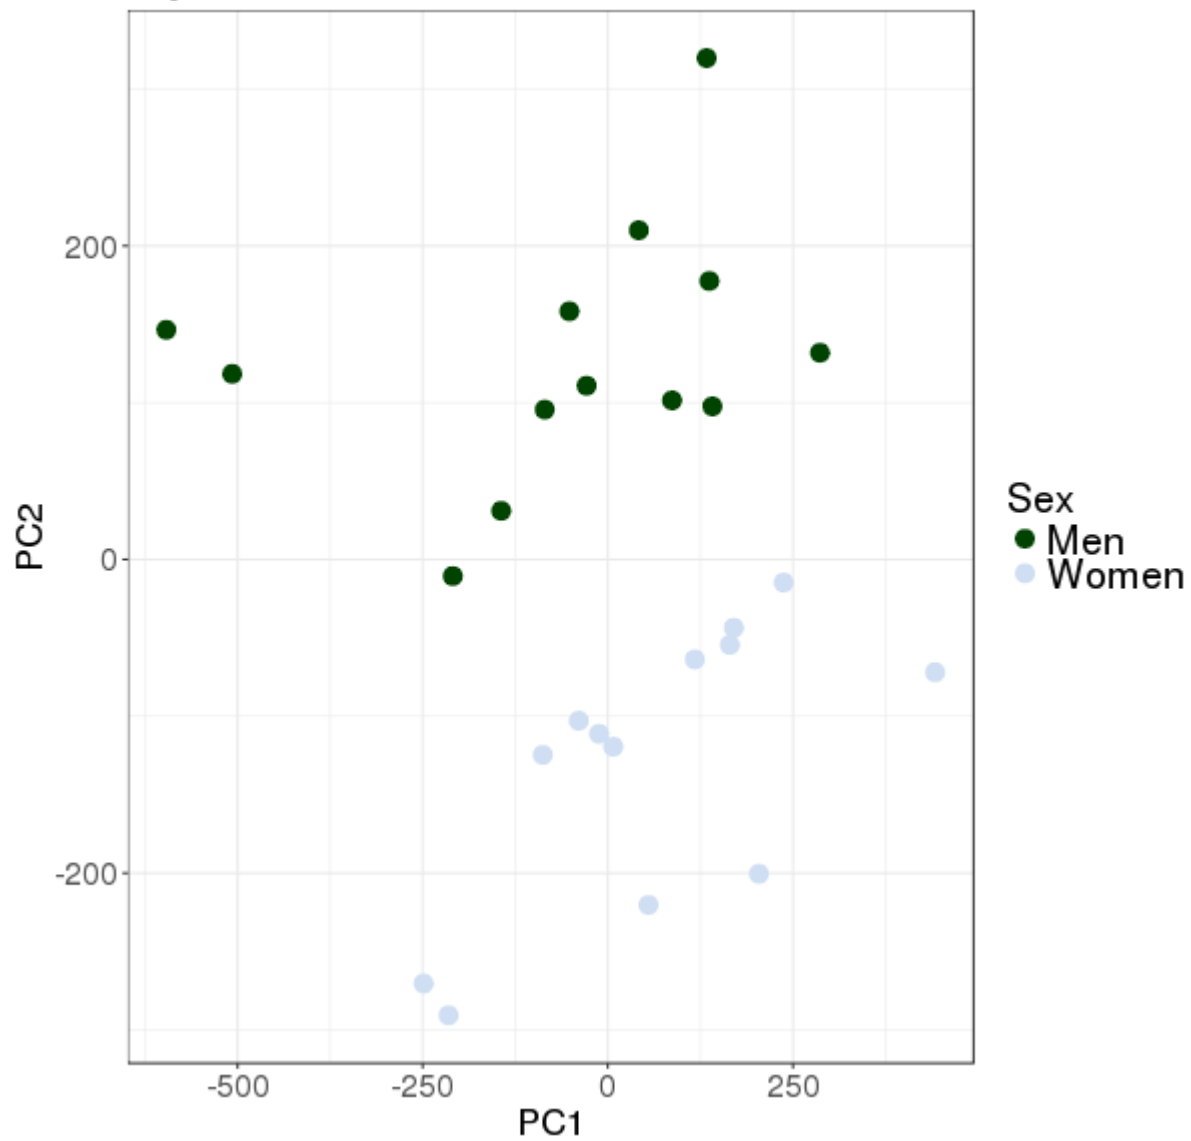

### Myotubes

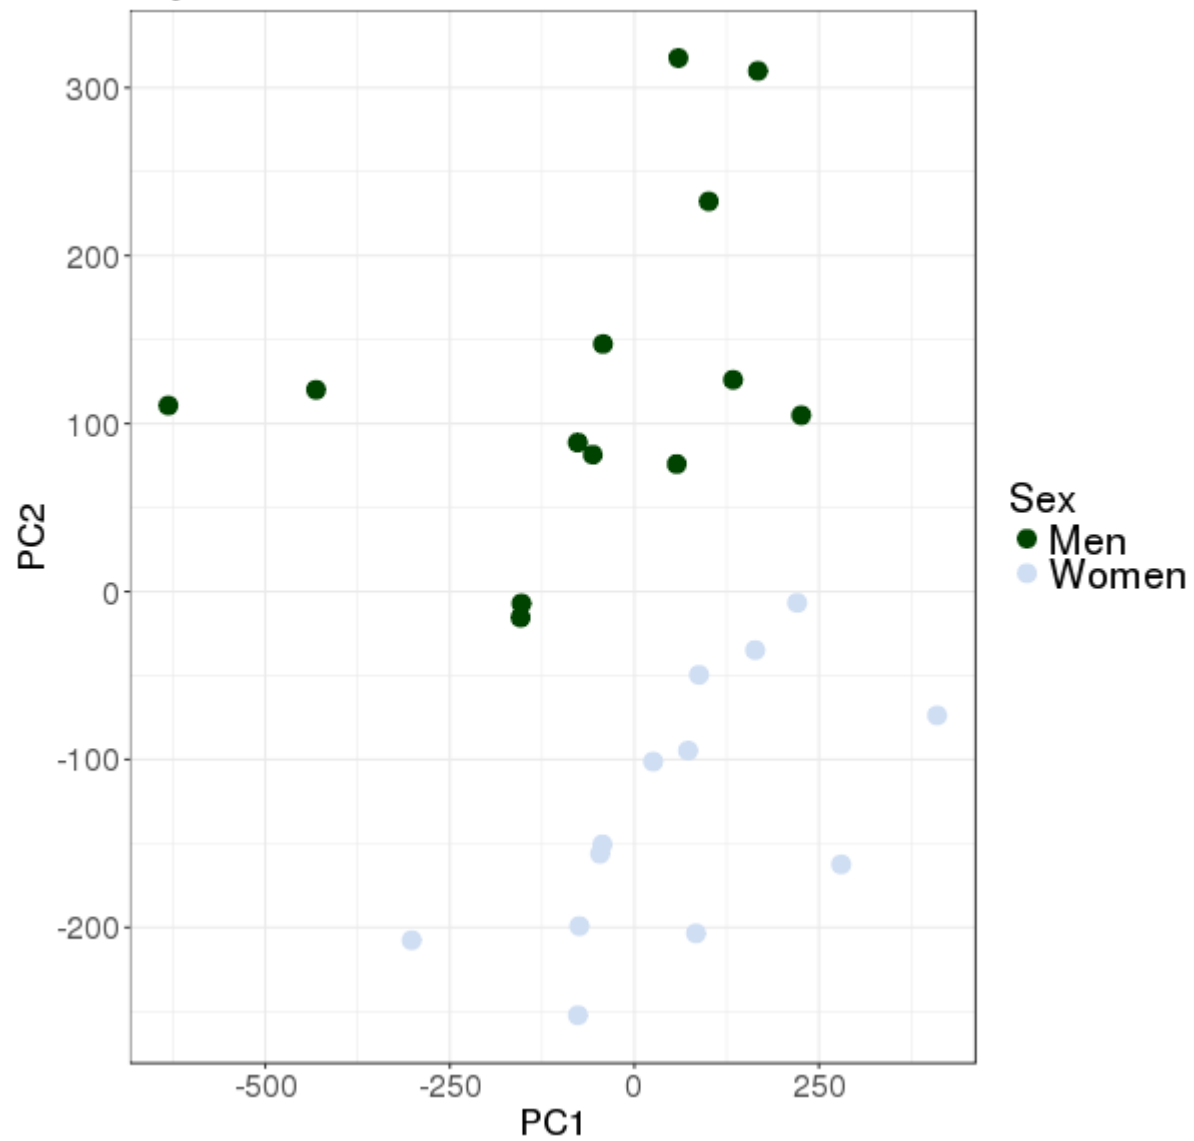

Supplement: 13287_2018_1118_MOESM2_ESM.pdf [file 13287_2018_1118_MOESM2_ESM.pdf]
