# Supplementary material for: Sex influences DNA methylation and gene expression in human skeletal muscle myoblasts and myotubes
Source: PubMed Central journal article supplement (PMC6332625; doi:10.1186/s13287-018-1118-4), 2019-01-15

**A**

### X-chromosome women versus men

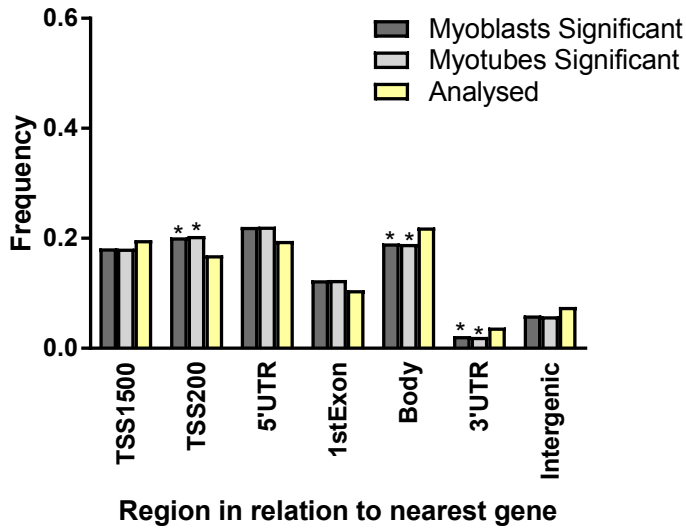**B**

### Autosomes women versus men

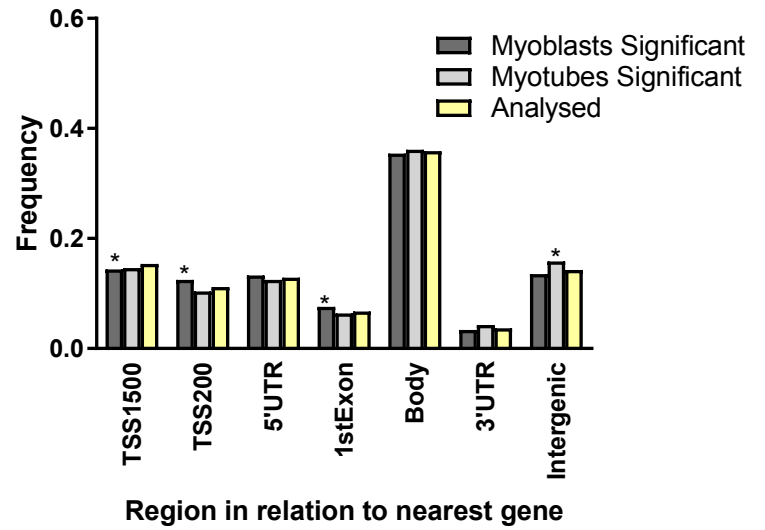**C**

### X-chromosome women versus men

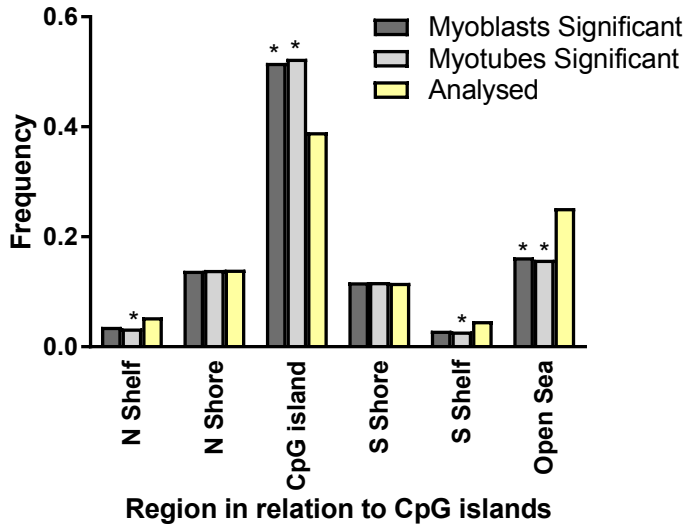**D**

### Autosomes women versus men

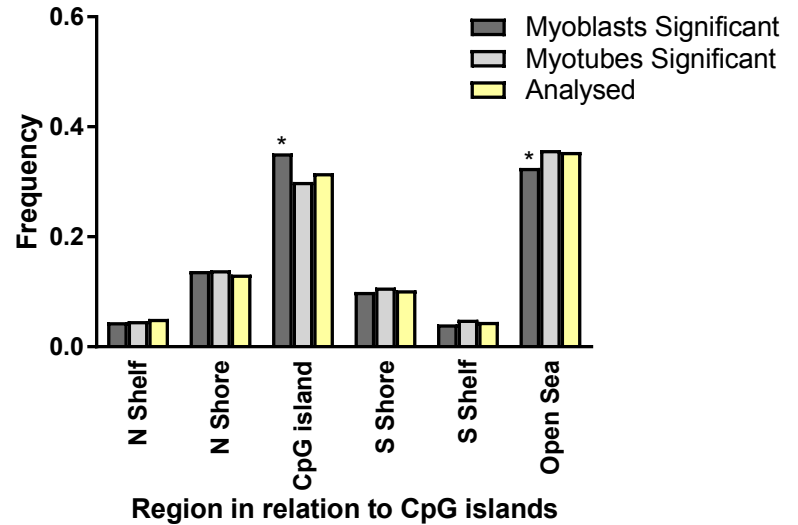**E**

### All chromosomes myoblasts versus myotubes

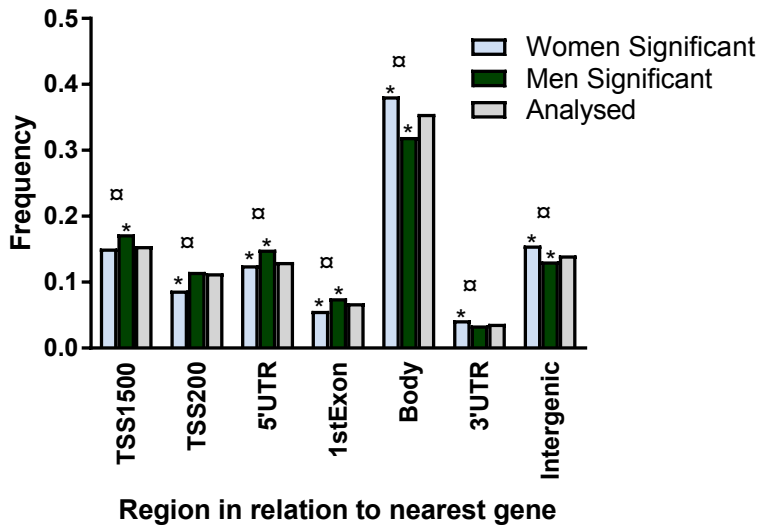**F**

### All chromosomes myoblasts versus myotubes

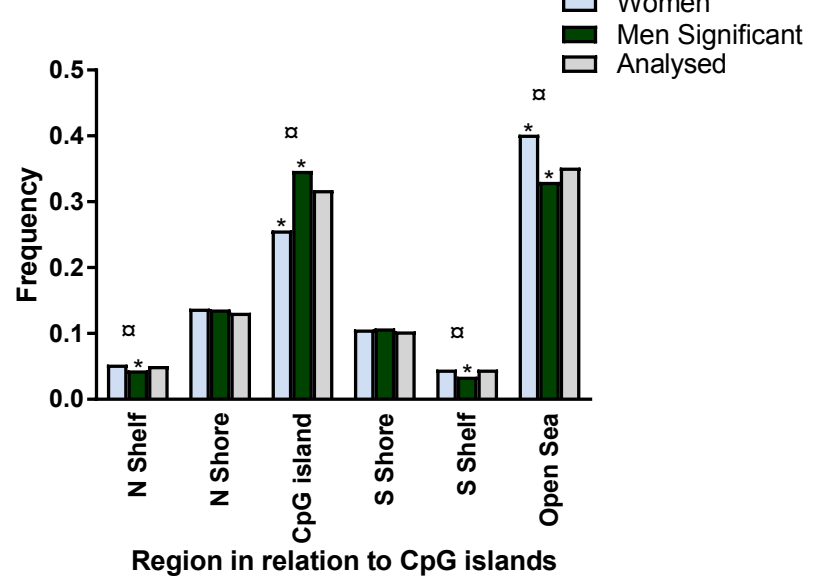

Supplement: 13287_2018_1118_MOESM4_ESM.pdf [file 13287_2018_1118_MOESM4_ESM.pdf]
