# Supplementary material for: Sex influences DNA methylation and gene expression in human skeletal muscle myoblasts and myotubes
Source: PubMed Central journal article supplement (PMC6332625; doi:10.1186/s13287-018-1118-4), 2019-01-15

Region in relation to nearest gene  
(Autosomes)

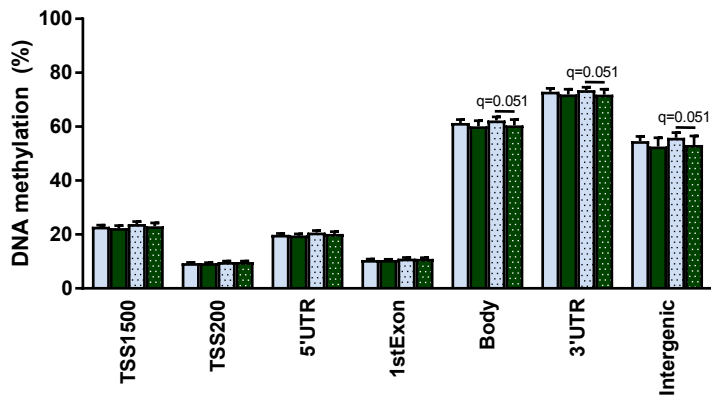

Region in relation to CpG Islands  
(Autosomes)

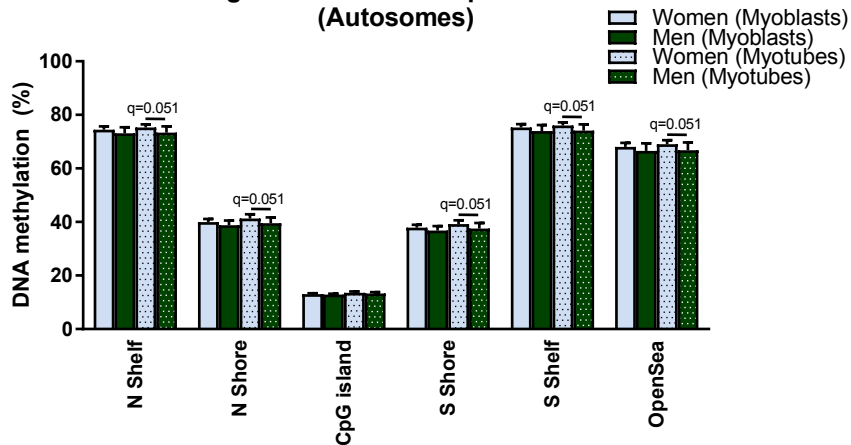

Region in relation to nearest gene  
(X-chromosome)

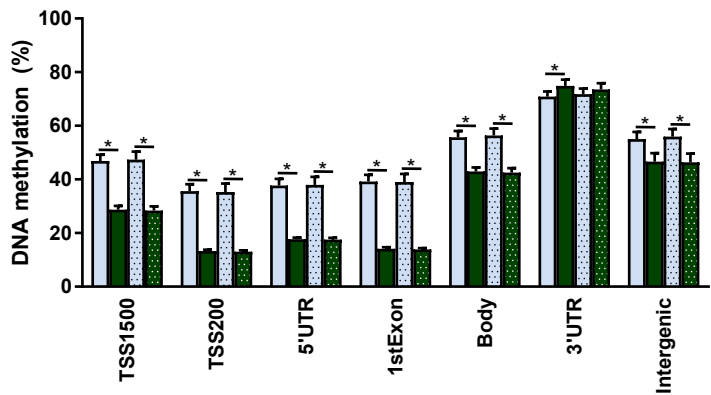

Region in relation to CpG Islands  
(X-chromosome)

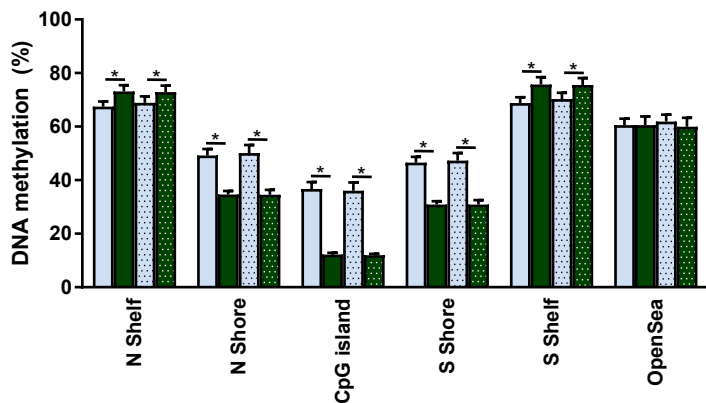

Supplement: 13287_2018_1118_MOESM8_ESM.pdf [file 13287_2018_1118_MOESM8_ESM.pdf]
