# Supplementary material for: Sex influences DNA methylation and gene expression in human skeletal muscle myoblasts and myotubes
Source: PubMed Central journal article supplement (PMC6332625; doi:10.1186/s13287-018-1118-4), 2019-01-15

## A Myogenic regulatory factors

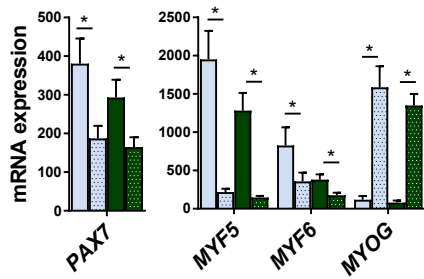

## B Myocyte enhancer factor 2

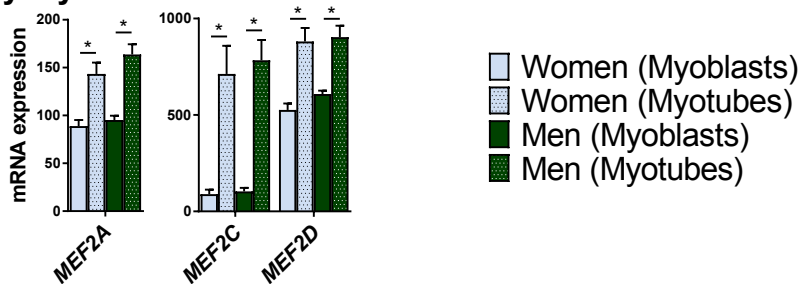

## C Myosin heavy and light chain genes

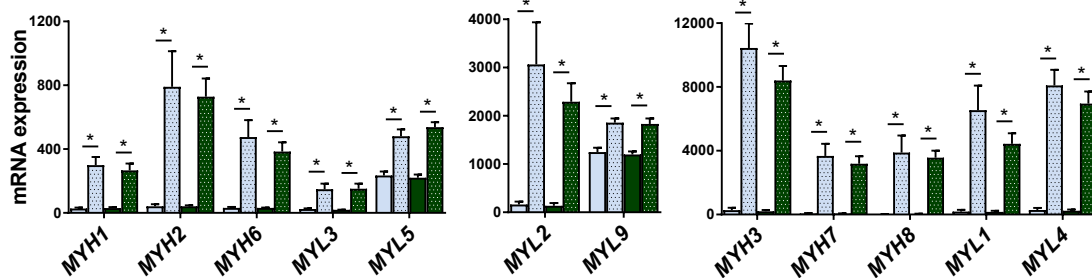

## D Troponin genes

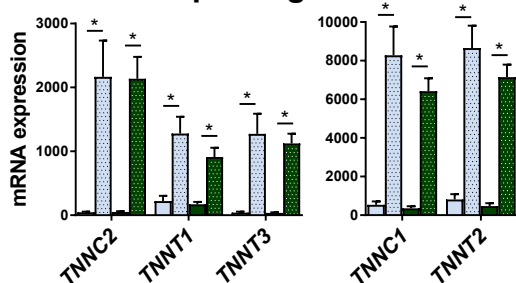

## G Cell cycle genes

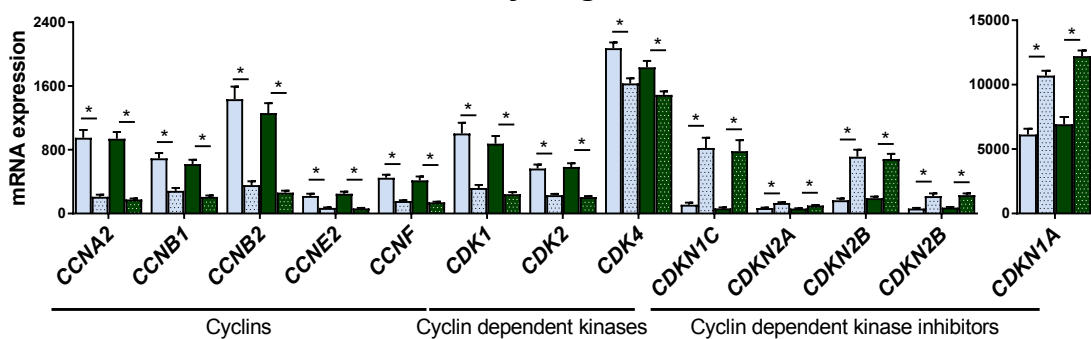

## F Replication markers

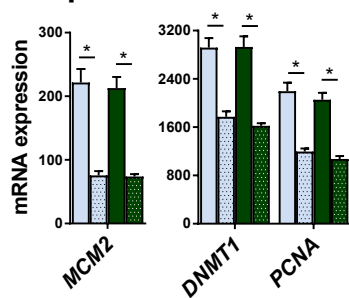

Supplement: 13287_2018_1118_MOESM10_ESM.pdf [file 13287_2018_1118_MOESM10_ESM.pdf]
